# Supplementary material for: BuShen HuoXue Decoction Promotes Decidual Stromal Cell Proliferation via the PI3K/AKT Pathway in Unexplained Recurrent Spontaneous Abortion
Source: PubMed Central journal article supplement (PMC7556073; doi:10.1155/2020/6868470), 2020-10-05
Supplement: 6868470.f1.pdf [file 6868470.f1.pdf]

## Appendix I

The chromatographic peaks of individual components of BSHXD in the positive and negative ion modes are as follows:

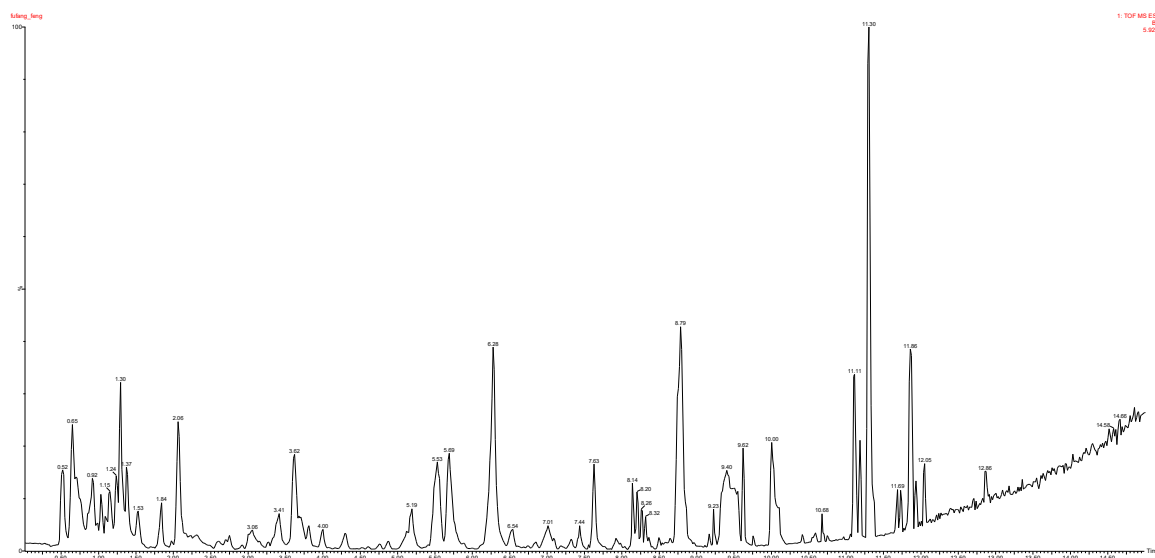

Positive ion chromatography of BSHXD

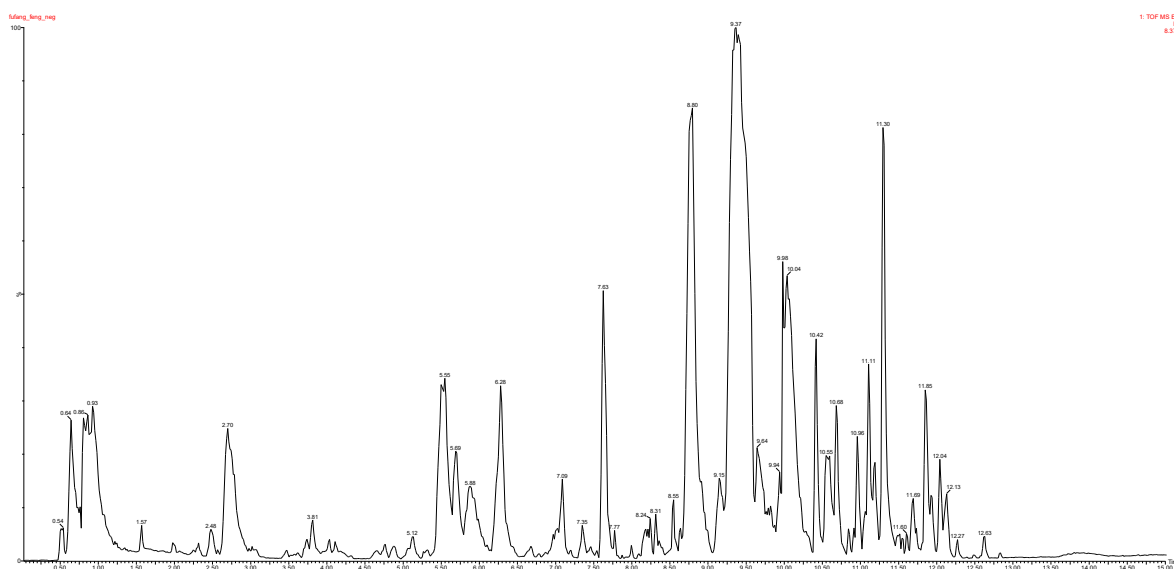

Negative ion chromatography of BSHXD

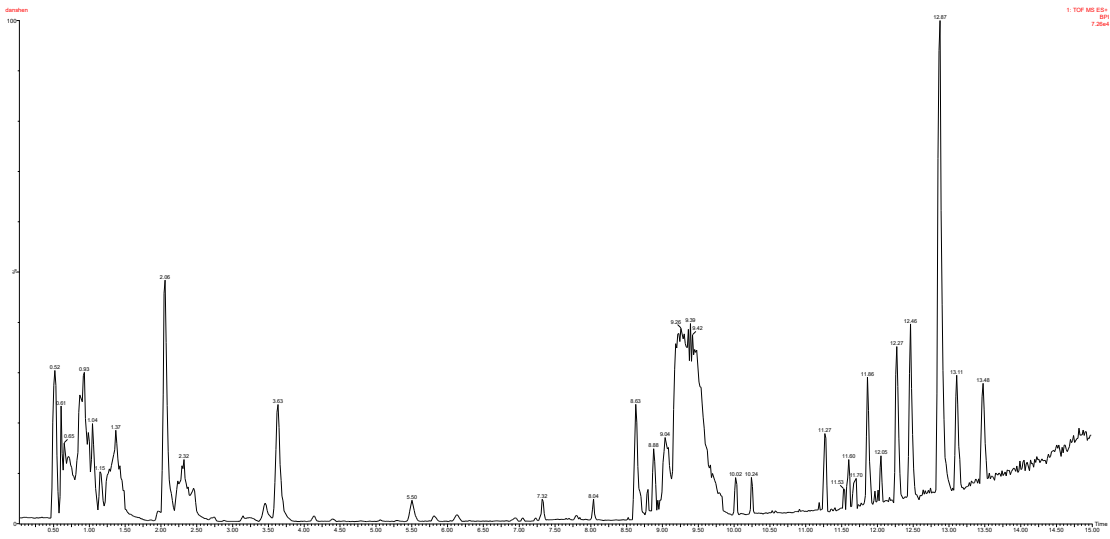

Positive ion chromatogram of *Radix salviae miltiorrhizae*

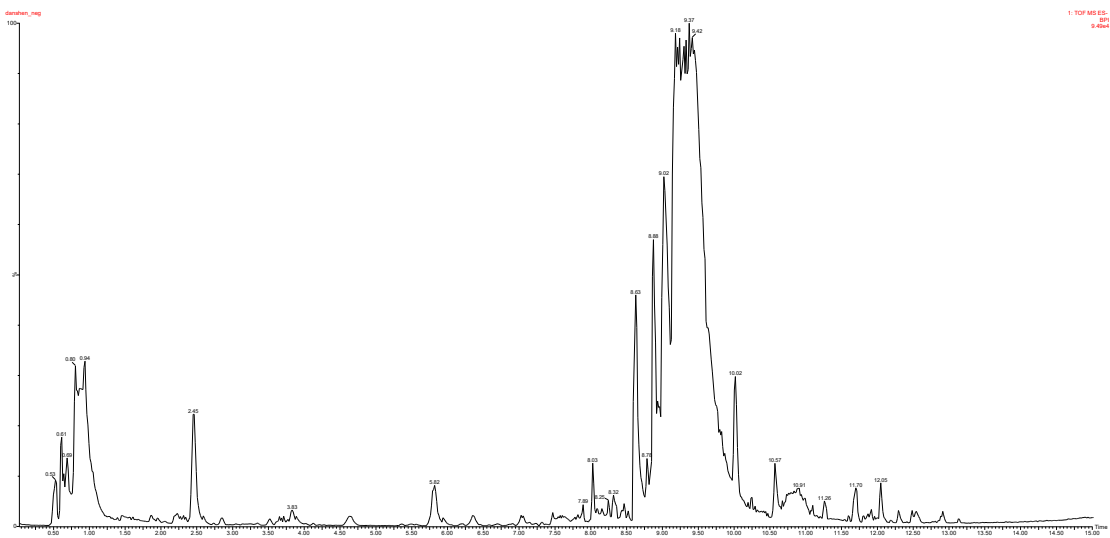

Negative ion chromatogram of *Radix salviae miltiorrhizae*

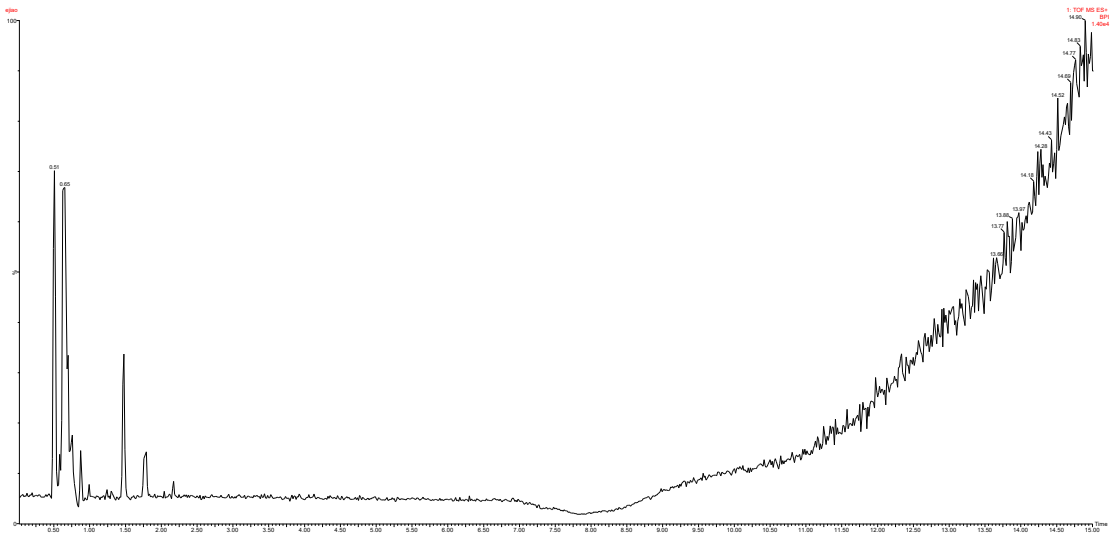

Positive ion chromatogram of Donkey-hide Glue

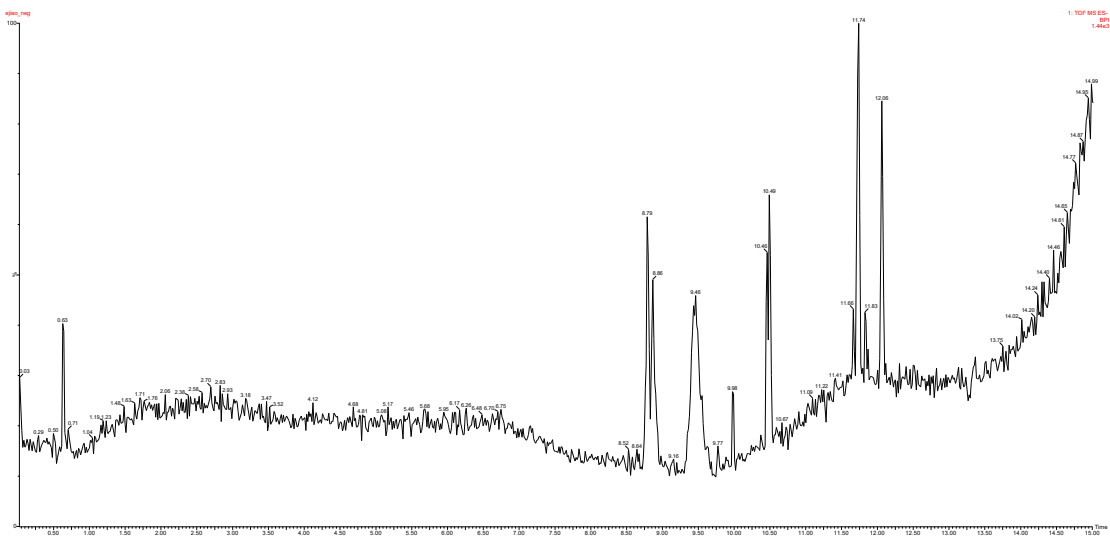

Negative ion chromatogram of Donkey-hide Glue

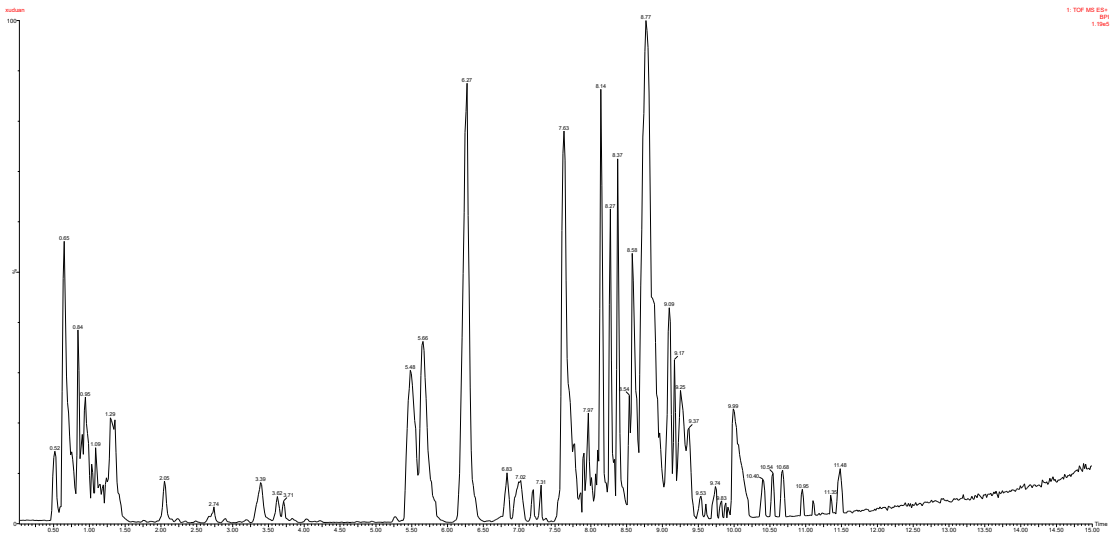

Positive ion chromatogram of Himalayan Teasel Root

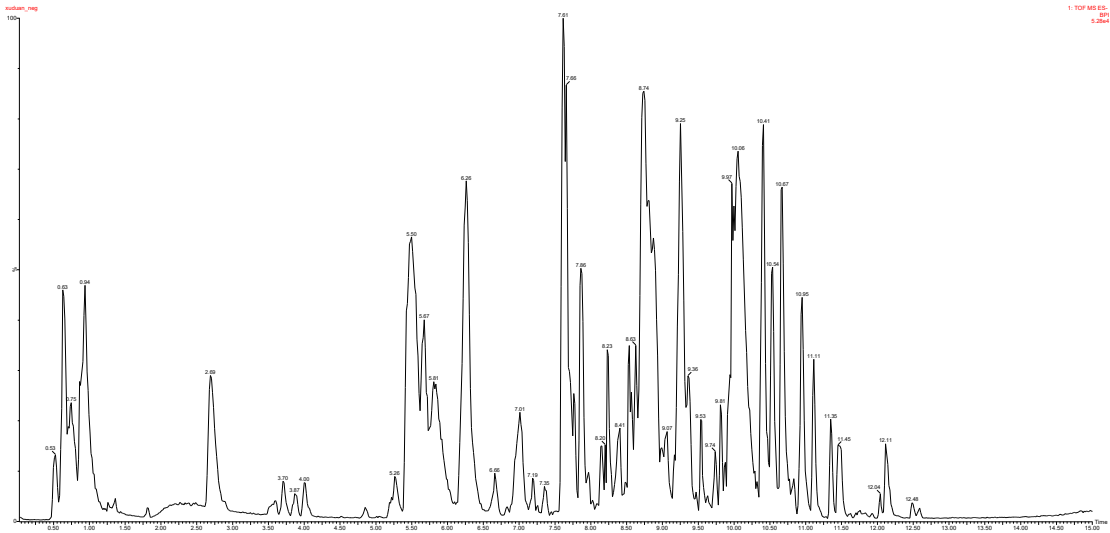

Negative ion chromatogram of Himalayan Teasel Root

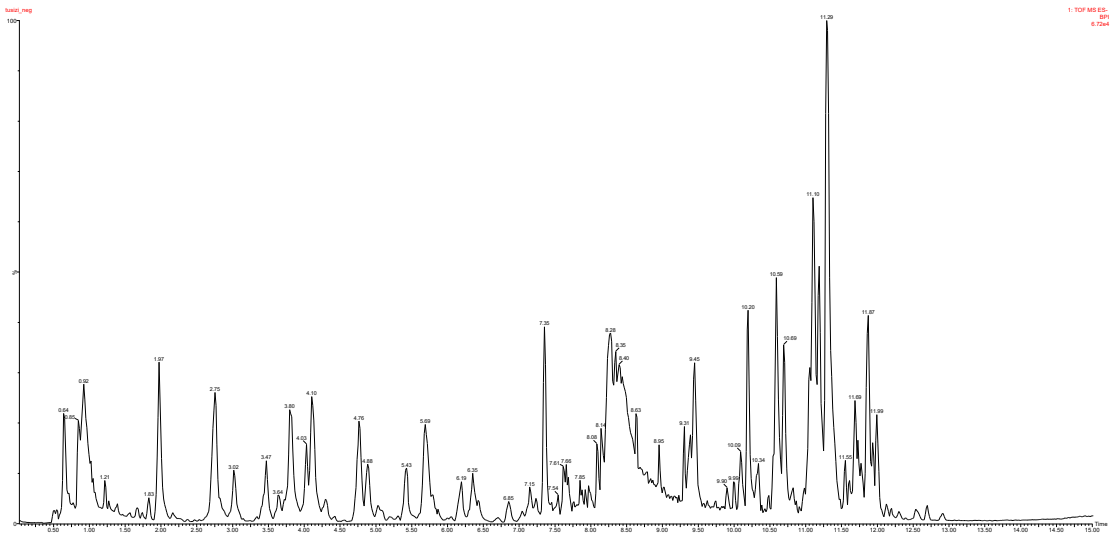

Positive ion chromatogram of Chinese Dodder Seed

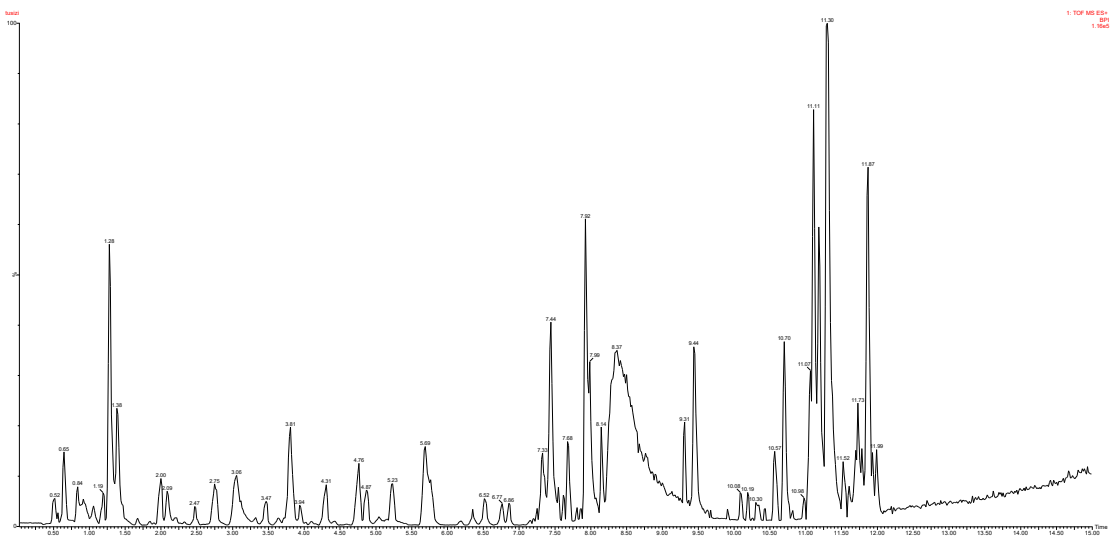

Negative ion chromatogram of Chinese Dodder Seed

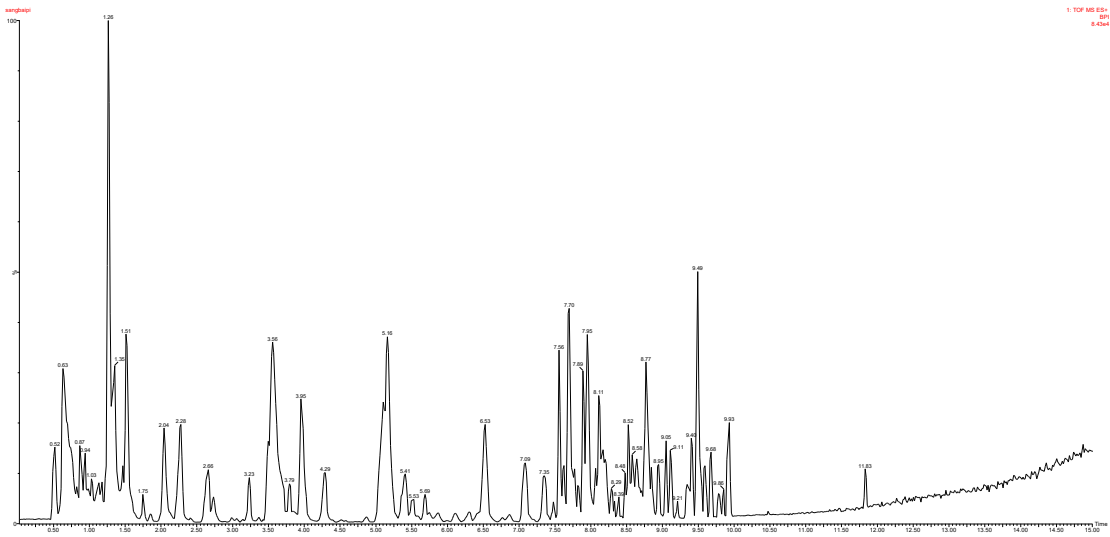

Positive ion chromatogram of Herba taxilli

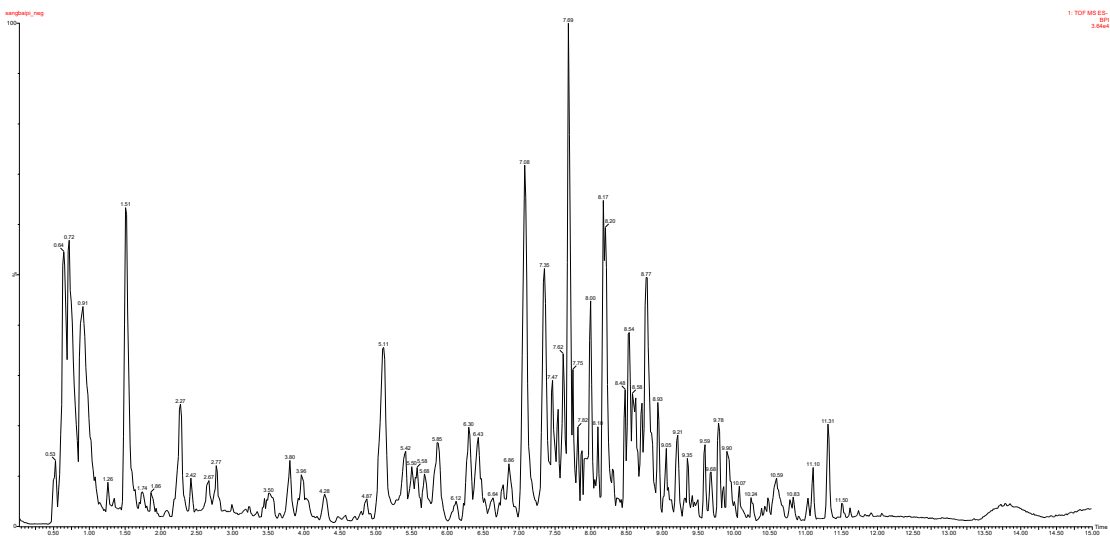

Negative ion chromatogram of Herba taxilli

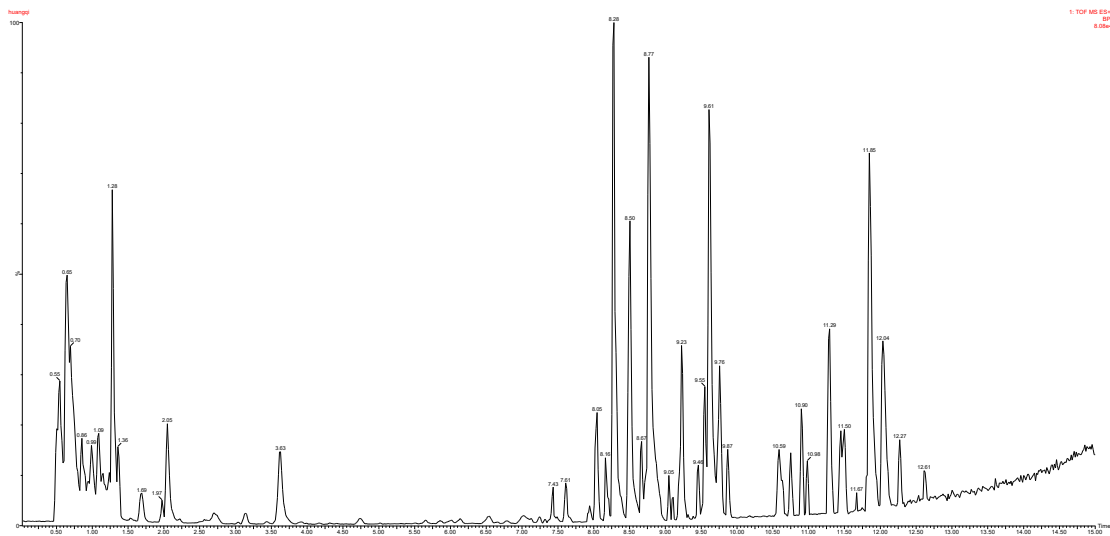

Positive ion chromatogram of Radix Astragali

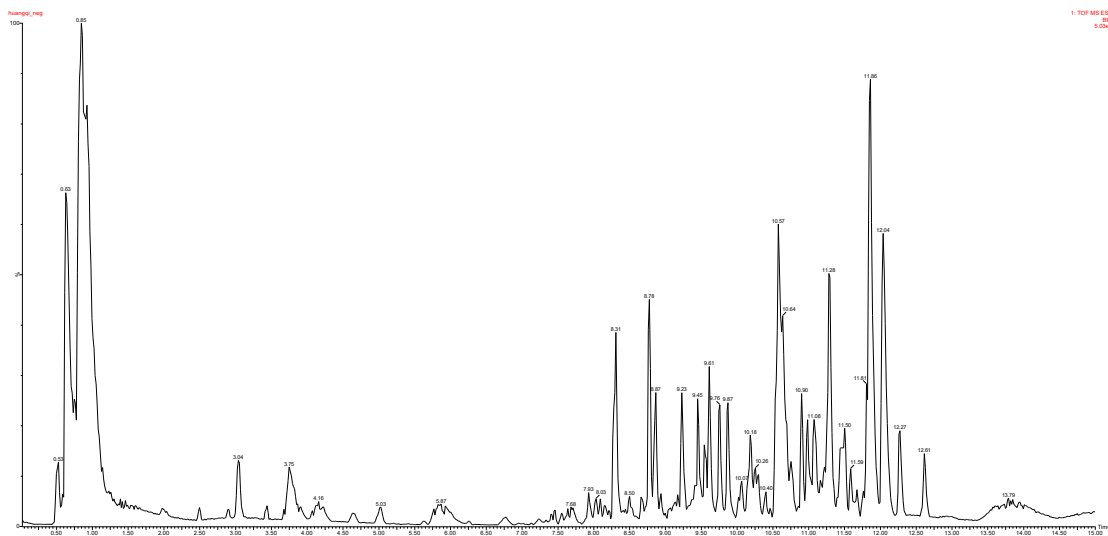

Negative ion chromatogram of Radix Astragali

## Appendix II

Because the incomplete information of each traditional Chinese medicine included in the WATERS TCM database is not necessarily complete, so there will be some peaks without identification information. It can be seen from the chromatogram that the chromatographic peak of the whole formula is a collection of each single drug. In the experiment, positive and negative ions were collected separately, and most of the positive and negative ions responded. If positive and negative ions detected the same compound, only positive ion identification information was retained. We identified the components of the whole formula, and identified the source of the components in combination with the chromatographic peak of the single drug. A total of 75 compounds were identified. The results are as follows:

### Radix salviae miltiorrhizae(21)

| Mode              | Compound name                                                                                   | mass number | Retention time (min) | Additive form | ion |
|-------------------|-------------------------------------------------------------------------------------------------|-------------|----------------------|---------------|-----|
|                   | caffeic acid                                                                                    | 180.0423    | 5.84                 | +H            |     |
|                   | Lithospermic acid                                                                               | 538.1111    | 8.65                 | +H,+Na,+NH4   |     |
|                   | Rosmarinic acid                                                                                 | 360.0845    | 8.90                 | +H,+Na,+NH4   |     |
|                   | salvianolic acid E                                                                              | 718.1534    | 8.99                 | +H,+Na,+NH4   |     |
|                   | salvianolic acid B                                                                              | 718.1534    | 9.34                 | +H,+Na,+NH4   |     |
|                   | Danshenxinkun A                                                                                 | 296.1049    | 11.20                | +H,+Na        |     |
|                   | 9-Hydroxy-1,6,6-trimethyl-6,7,8,9-tetrahydrophenanthro[1,2-b]furan-10,11-dione                  | 310.1205    | 11.60                | +H,+Na,+NH4   |     |
| Positive ion mode | (1R,10S)-10-hydroxy-1,6-dimethyl-10-(2-oxopropyl)-1,2-dihydronaphtho[1,2-g][1]benzofuran-11-one | 296.1049    | 11.92                | +H            |     |
|                   | Isocryptotanshinone                                                                             | 296.1412    | 12.05                | +H            |     |
|                   | Dihydrotanshinone I                                                                             | 278.0943    | 12.28                | +H,+Na        |     |
|                   | 1,6-dimethyl-1,2,8,9-tetrahydrophenanthro[1,2-g][1]benzofuran-10,11-dione                       | 280.1099    | 12.47                | +H,+Na,-e     |     |
|                   | Tanshinone IIB                                                                                  | 296.1412    | 12.87                | +H,+Na        |     |
|                   | 15,16-dihydrotanshinone                                                                         | 278.0943    | 13.12                | +H,+Na,-e     |     |
|                   | Tanshinone IIA                                                                                  | 294.1256    | 13.48                | +H,+Na,+NH4   |     |
| Negative          | 2-(3,4-dihydroxyphenyl)-2-hydroxypropanoic acid                                                 | 198.0528    | 2.49                 | -H,+HCOO      |     |



|          |                                                                                                               |          |       |       |
|----------|---------------------------------------------------------------------------------------------------------------|----------|-------|-------|
| ion mode | 3,4-Dihydroxybenzaldehyde                                                                                     | 138.0317 | 3.86  | -H    |
|          | Salvianolic acid A                                                                                            | 494.1213 | 8.33  | +HCOO |
|          | Salvianolic acid C                                                                                            | 492.1056 | 8.39  | +HCOO |
|          | (2R)-2-((2E)-3-[2-(Carboxymethyl)-3,4-dihydroxyphenyl]-2-propenoyl}oxy)-3-(3,4-dihydroxyphenyl)propanoic acid | 418.0900 | 8.72  | -H    |
|          | methyl lithospermate                                                                                          | 552.1268 | 9.02  | -H    |
|          | 6-Hydroxy-1,6-dimethyl-6,7,8,9-tetrahydrophenanthro[1,2-b]furan-10,11-dione                                   | 296.1049 | 10.30 | +HCOO |

### Donkey-hide Glue ( 2 )

| mode              | Compound name              | mass number | Retention time (min) | Additive ion form |
|-------------------|----------------------------|-------------|----------------------|-------------------|
| Positive ion mode | 3,4-Dimethoxycinnamic acid | 208.07356   | 0.51                 | -e,+Na            |
|                   | Diisobutyl phthalate       | 278.15181   | 13.29                | +H,+Na            |

### Himalayan Teasel Root ( 3 )

| mode              | Compound name                           | mass number | Retention time (min) | Additive ion form |
|-------------------|-----------------------------------------|-------------|----------------------|-------------------|
|                   | Loganic acid                            | 376.13695   | 6.27                 | +H,+Na,+NH4       |
| Positive ion mode | Loganic acid 6'-O- $\beta$ -D-glucoside | 538.18977   | 7.57                 | +H,+Na,+NH4       |
|                   | asperosaponin VI                        | 928.50317   | 10.02                | +H,+NH4           |

### Chinese Dodder Seed ( 18 )

| mode              | Compound name                             | mass number | Retention time (min) | Additive ion form |
|-------------------|-------------------------------------------|-------------|----------------------|-------------------|
|                   | N-methylcytisine                          | 204.12626   | 3.74                 | +H                |
|                   | d-Sesamin                                 | 354.11034   | 5.77                 | +H,+Na,+NH4       |
|                   | Sophoranol                                | 264.18378   | 5.85                 | +H                |
| Positive ion mode | Quercetin-3-galactose-7-glucoside         | 626.14830   | 6.92                 | +H,+Na            |
|                   | New Cuscutoside B                         | 796.24259   | 7.87                 | +H,+NH4           |
|                   | Cuscutoside A                             | 664.20034   | 8.24                 | +H,+Na,+NH4       |
|                   | Quercetin-3-o- $\beta$ -d-glucopyranoside | 464.09548   | 8.34                 | +H,+Na            |
|                   | Cuscutoside C                             | 694.21090   | 8.48                 | +H                |

|                   |                                      |           |       |                         |
|-------------------|--------------------------------------|-----------|-------|-------------------------|
|                   | Kaempferol-3-o- $\beta$ -D-glucoside | 448.10056 | 8.66  | +H,+Na                  |
|                   | Cuscutoside B                        | 664.20034 | 9.58  | +H,+Na,+NH <sub>4</sub> |
|                   | Kaempferol                           | 286.04774 | 10.12 | +H,-e                   |
|                   | (1E,4E,8E)- $\alpha$ -humulene       | 204.18780 | 12.00 | +Na                     |
|                   | Sesamolin                            | 370.10525 | 1.34  | +HCOO                   |
|                   | New Cuscutoside A                    | 826.25316 | 7.97  | +HCOO                   |
|                   | Quercetin                            | 302.04265 | 9.55  | -H                      |
| Negative ion mode | Palmitic acid                        | 256.24023 | 9.69  | +HCOO                   |
|                   | Octadecanoic acid                    | 284.27153 | 10.60 | +HCOO                   |
|                   | Matrine                              | 248.18886 | 12.07 | +HCOO                   |

### Herba taxilli ( 2 )

| Mode              | Compound name                               | mass number | Retention time (min) | Additive ion form |
|-------------------|---------------------------------------------|-------------|----------------------|-------------------|
| Positive ion mode | dl-catechin                                 | 290.07904   | 0.72                 | +H                |
| Negative ion mode | Quercetin-3-O- $\alpha$ -L-rhamnopyranoside | 448.10056   | 7.52                 | -H                |

### Radix Astragali(29)

| Mode     | Compound name                                             | mass number | Retention time (min) | Additive ion form        |
|----------|-----------------------------------------------------------|-------------|----------------------|--------------------------|
|          | Polycanthine                                              | 261.13649   | 1.35                 | +Na                      |
|          | Astragalosine A                                           | 209.06881   | 2.61                 | +NH <sub>4</sub>         |
|          | Linoleic acid                                             | 280.24023   | 7.27                 | +Na                      |
|          | 3'-methoxy-5'-hydroxyisoflavone-7-O- $\beta$ -D-glucoside | 446.12130   | 8.32                 | +H,+Na                   |
|          | Formononetin                                              | 268.07356   | 8.36                 | +Na                      |
|          | Calycosin-7-O- $\beta$ -D-glucoside                       | 446.12130   | 8.42                 | +H                       |
|          | 3,4-Dimethoxy-7,2'-O-diglucoside-7-O-glucoside            | 626.22107   | 8.71                 | +Na,+NH <sub>4</sub> ,-e |
|          | kaempferol-Methylether-3-7-O- $\beta$ -D-glucopyranoside  | 462.11621   | 9.47                 | +H,+Na,+NH <sub>4</sub>  |
|          | Astragaloside V                                           | 946.51373   | 9.92                 | +H,+Na,+NH <sub>4</sub>  |
|          | Astragaloside VI                                          | 946.51373   | 10.60                | +H,+Na,+NH <sub>4</sub>  |
|          | Astragalus membranaceus saponin B                         | 652.41865   | 10.70                | +H,+Na                   |
| Positive | Formononetin                                              | 268.07356   | 10.77                | +H                       |

|                      |                                               |            |       |             |
|----------------------|-----------------------------------------------|------------|-------|-------------|
| ion mode             | Isoastragaloside IV                           | 784.46091  | 10.92 | +H,+Na,+NH4 |
|                      | Astragaloside III                             | 784.46091  | 10.92 | +H,+Na,+NH4 |
|                      | Astragaloside IV                              | 784.46091  | 11.00 | +H,+Na,+NH4 |
|                      | Isomucronulatol                               | 302.11542  | 11.05 | +H,-e       |
|                      | Agroastragaloside III                         | 1030.53486 | 11.09 | +H,+Na      |
|                      | Astragaloside II                              | 826.47147  | 11.30 | +H,+Na,+NH4 |
|                      | Astragalus membranaceus<br>Astragaloside II   | 622.40808  | 11.37 | +H,+Na      |
|                      | Agroastragaloside I                           | 912.50825  | 11.60 | +H,+Na,+NH4 |
|                      | Agroastragaloside VIII                        | 912.50825  | 11.77 | +H,+Na,+NH4 |
|                      | Isoastragaloside I                            | 868.48204  | 12.28 | +H,+Na,+NH4 |
|                      | Astragaloside I                               | 868.48204  | 12.28 | +H,+Na,+NH4 |
|                      | acetylastragaloside I                         | 910.49260  | 12.63 | +H,+Na,+NH4 |
| Negative<br>ion mode | Apigenin 7-glucoside                          | 432.14203  | 3.06  | +HCOO,-H    |
|                      | methylnissolin                                | 300.09977  | 5.06  | -H          |
|                      | Isoferulic acid                               | 194.05791  | 5.96  | +HCOO       |
|                      | Kaempferide-4'-dimethyl<br>ether-3 -glucoside | 462.11621  | 9.47  | +HCOO       |
|                      | Agroastragaloside IV                          | 988.52429  | 11.46 | -H          |

### Appendix III

The chromatographic peaks of the blood components in the blank group and the prescription for BXHXD in different time and in the mode of positive and negative ions are as follows:

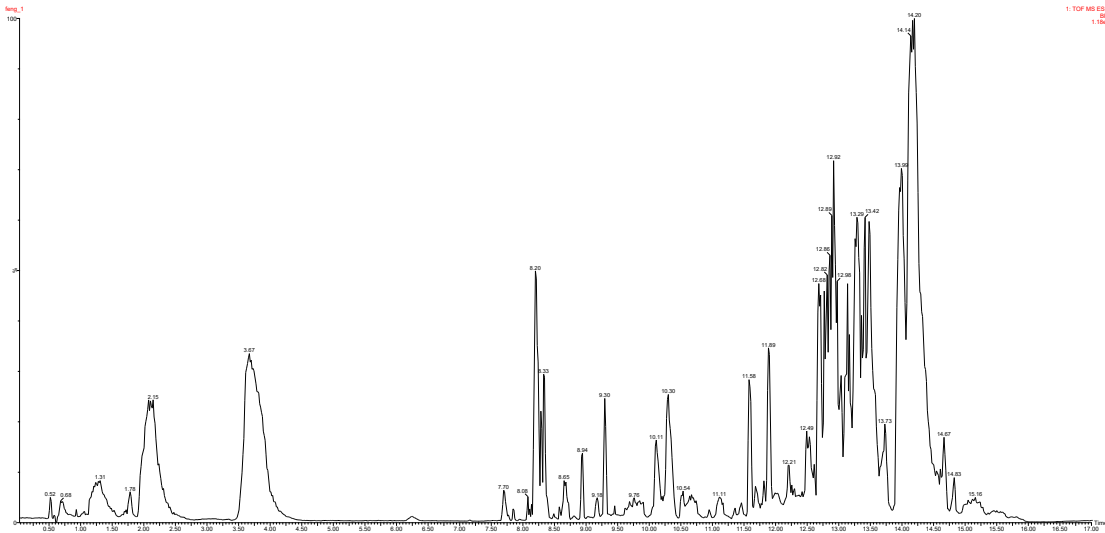

Chromatogram of blank serum in positive ion mode

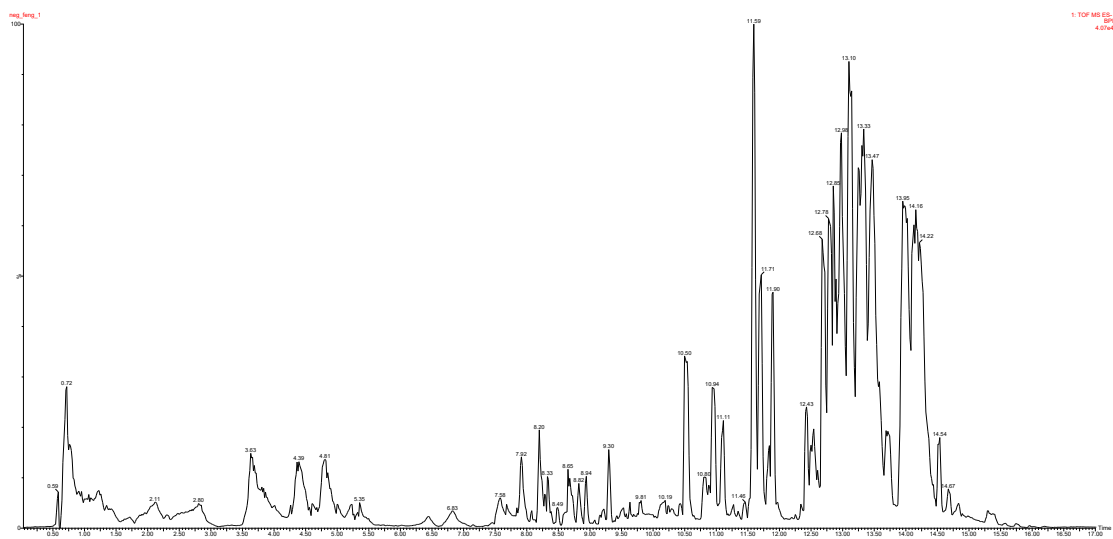

Chromatogram of blank serum in negative ion mode

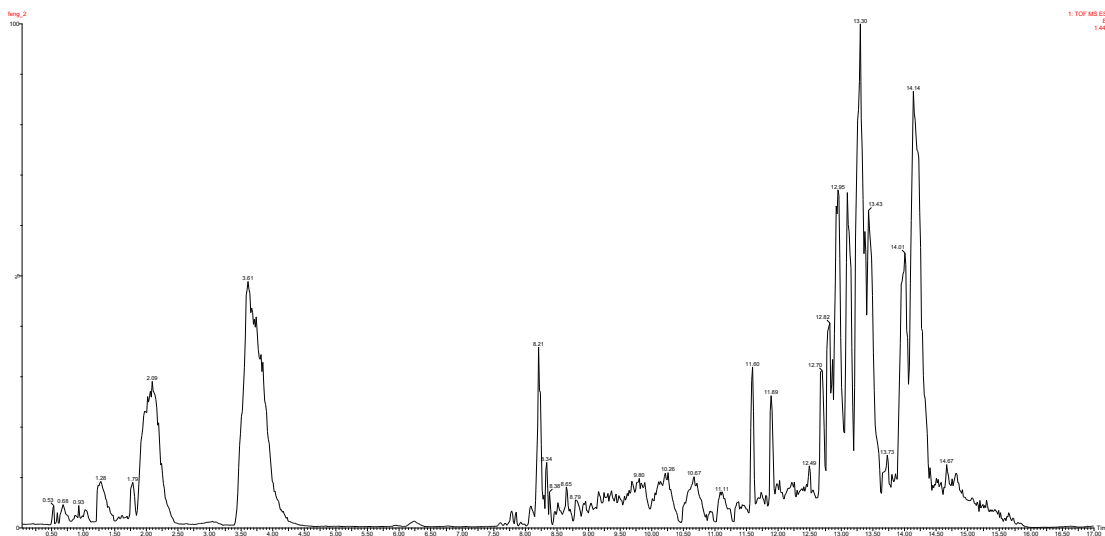

Chromatogram of BSHXDS in 15 min in positive ion mode

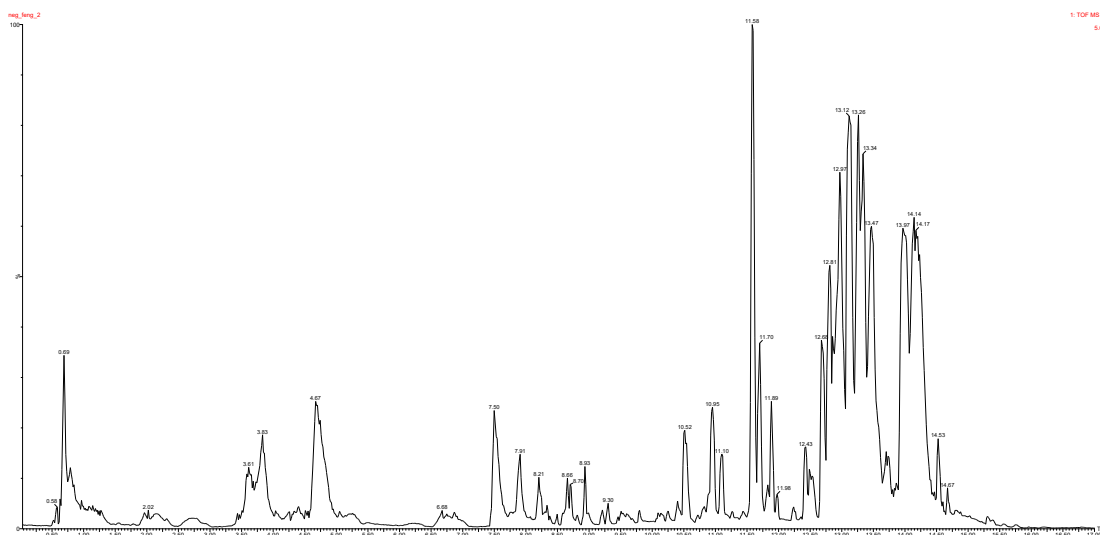

Chromatogram of BSHXDS for 15 min in negative ion mode

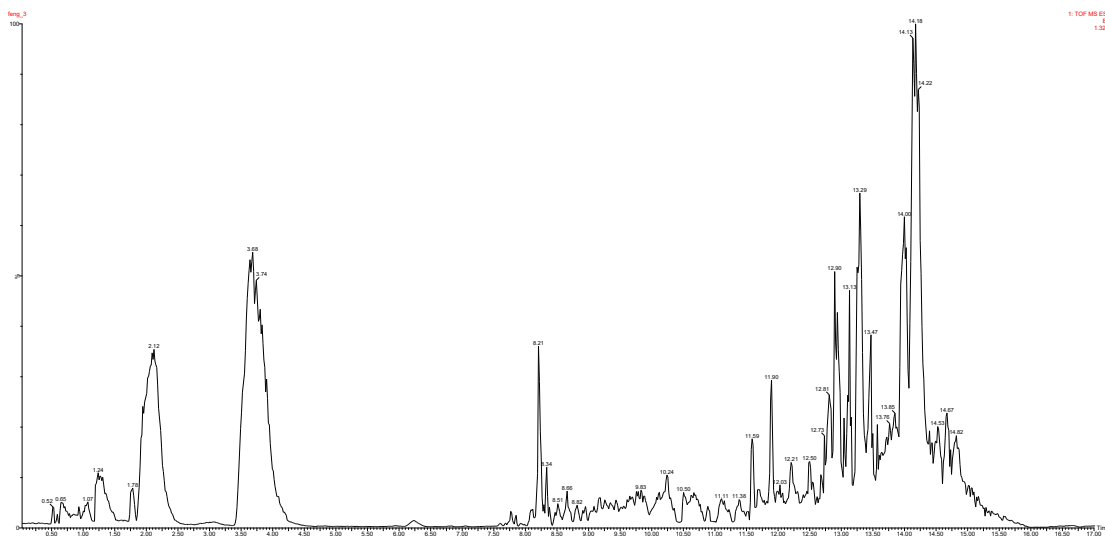

Chromatogram of BSHXDS in 30 min in positive ion mode

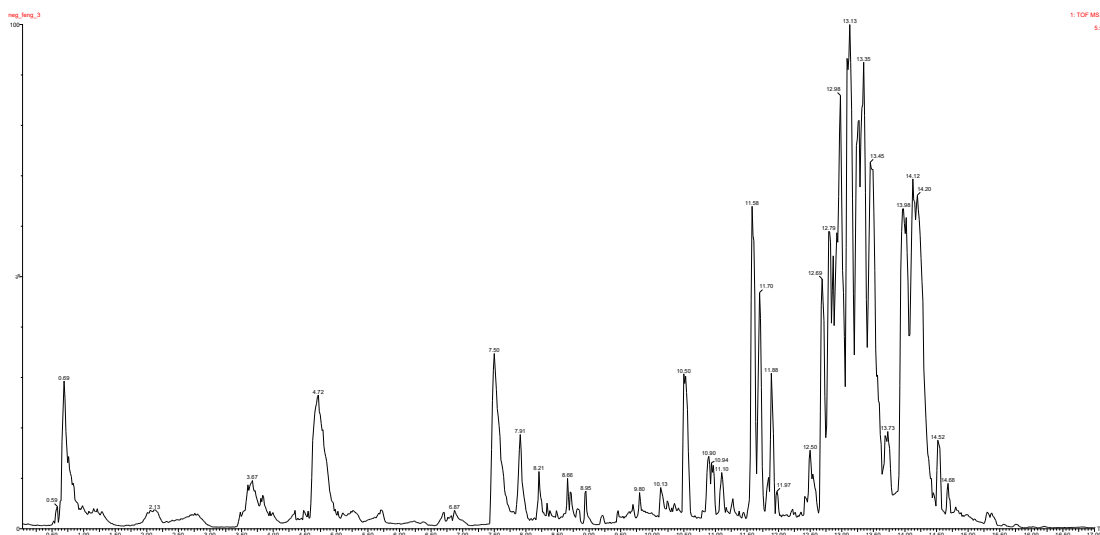

Chromatogram of BSHXDS for 30 min in negative ion mode

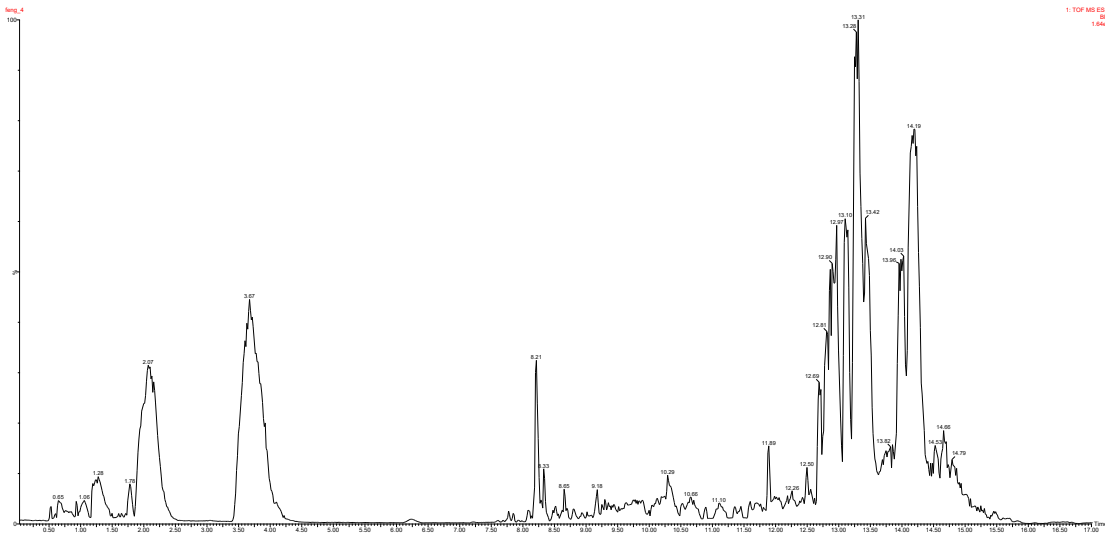

Chromatogram of BSHXDS in 1h in positive ion mode

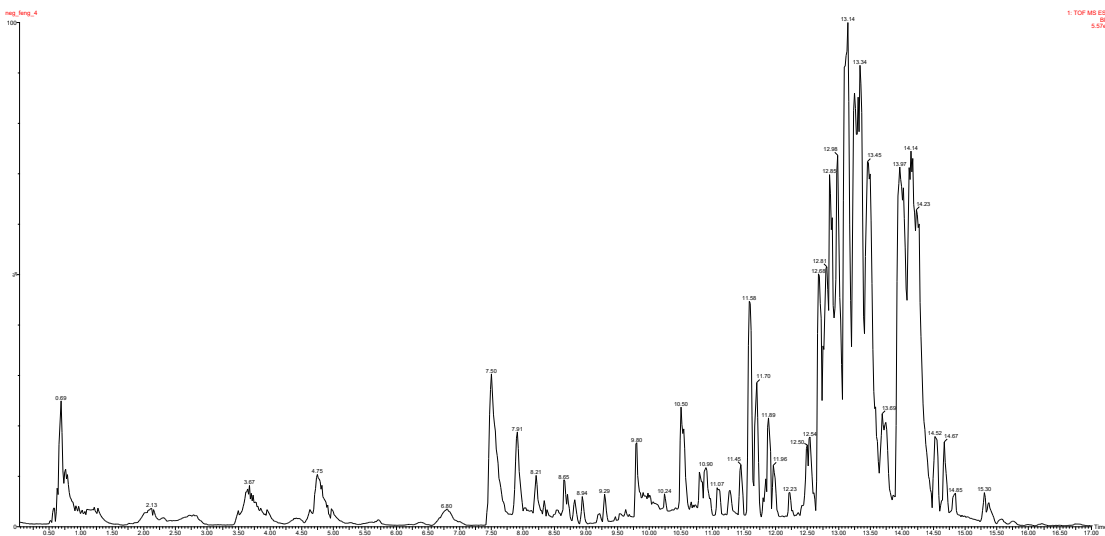

Chromatogram of BSHXDS for 1h in negative ion mode

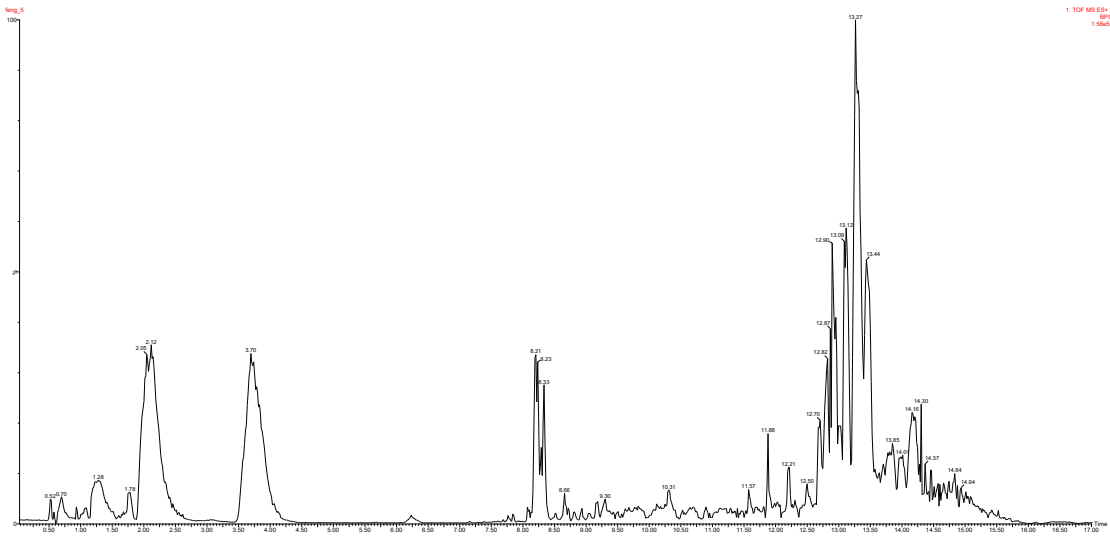

Chromatogram of BSHXDS in 2h in positive ion mode

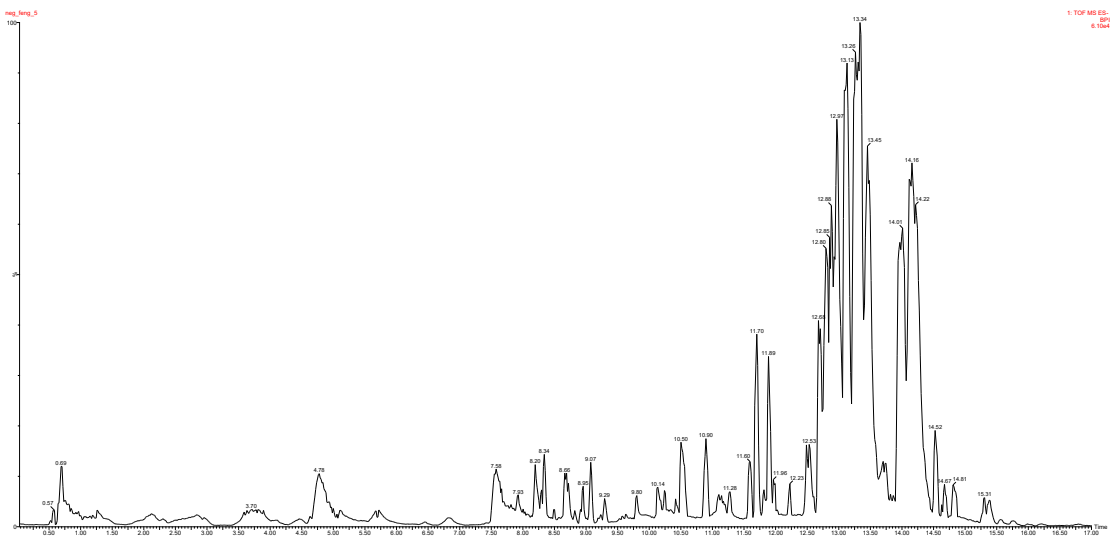

Chromatogram of BSHXDS for 2h in negative ion mode



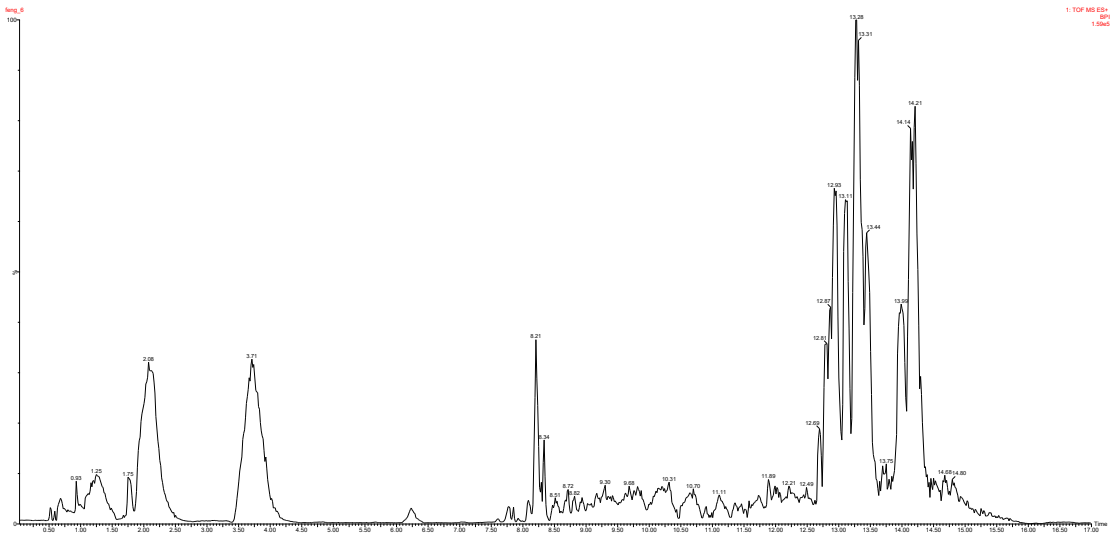

Chromatogram of BSHXDS in 4h in positive ion mode

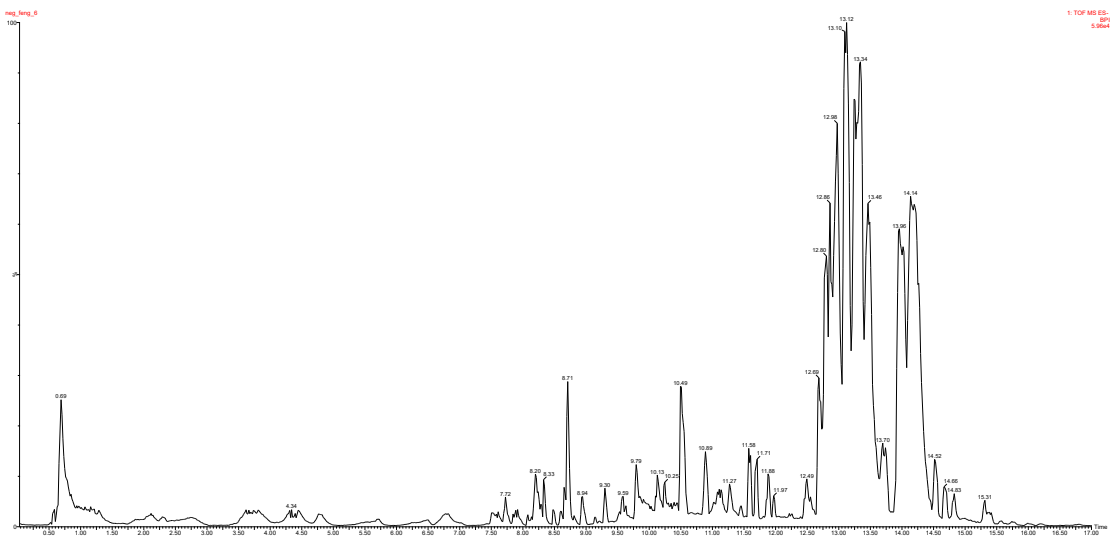

Chromatogram of BSHXDS for 4h in negative ion mode
